# Supplementary material for: A first-principles study on the electronic structure of BaSbO 3 and electron–phonon coupling in K-doped superconducting antimonate
Source: Royal Society of Chemistry journal article supplement (doi:10.1039/d5cp04497a), 2026-01-01
Supplement: d5cp04497a1.pdf [file d5cp04497a1.pdf]

# **A first-principles study on the electronic structure of BaSbO<sub>3</sub> and electron-phonon coupling in K-doped superconducting antimonate.**

## **Supplemental material**

Soubhik Bhattacharyya and P. M. Sarun\*

Functional Ceramics Laboratory, Department of Physics, Indian Institute of Technology (ISM),  
Dhanbad – 826004, INDIA.

The supplementary data of the present article can be found in the **LINK**

---

\*Corresponding Author. E-mail: sarun@iitism.ac.in (P.M. Sarun)
